# Supplementary material for: Dust Weight and Asthma Prevalence in the National Survey of Lead and Allergens in Housing (NSLAH)
Source: PubMed Central journal article supplement (PMC1817708; doi:10.1289/ehp.9412), 2006-11-07
Supplement: ehp0115-000215s1.pdf [file ehp0115-000215s1.pdf]

## Supplemental Material

Dust Weight and Asthma Prevalence in the National Survey of Lead and Allergens in Housing (NSLAH)

Leslie Elliott<sup>1</sup>, Samuel J. Arbes<sup>1</sup>, Eric S. Harvey<sup>2</sup>, Robert C. Lee<sup>2</sup>, Päivi M. Salo<sup>1</sup>, Richard D. Cohn<sup>2</sup>, Stephanie J. London<sup>1</sup>, and Darryl C. Zeldin<sup>1</sup>

<sup>1</sup>Laboratory of Respiratory Biology, Division of Intramural Research, NIEHS, NIH, Research Triangle Park, NC

<sup>2</sup>Constella Group, LLC, Durham, NC

Corresponding Author:

Darryl C. Zeldin, M.D.  
National Institute of Environmental Health Sciences  
111 T.W. Alexander Drive, Building 101, D236  
Research Triangle Park, NC 27709-2233  
Phone: 919-541-1169  
Fax: 919-541-4133  
email: zeldin@niehs.nih.gov

**Table S1. Dust Weight (mg) Summarized by Location and Levels of Factors**

| Factor                                | Total             | Bedroom Bed    |                   |          | Bedroom Floor  |                   |          | Living Room Floor |                   |          | Living Room Upholstery |                   |          | Kitchen Floor  |                   |          | Geometric mean |                   |          | Maximum        |                   |          |        |
|---------------------------------------|-------------------|----------------|-------------------|----------|----------------|-------------------|----------|-------------------|-------------------|----------|------------------------|-------------------|----------|----------------|-------------------|----------|----------------|-------------------|----------|----------------|-------------------|----------|--------|
|                                       | Sample Size **    | Geometric Mean | Geometric mean SE | p-values | Geometric Mean | Geometric mean SE | p-values | Geometric Mean    | Geometric mean SE | p-values | Geometric Mean         | Geometric mean SE | p-values | Geometric Mean | Geometric mean SE | p-values | Geometric Mean | Geometric mean SE | p-values | Geometric Mean | Geometric mean SE | p-values |        |
| Household Income by 20K               |                   | 770            |                   |          |                |                   |          |                   |                   |          |                        |                   |          |                |                   |          |                |                   |          |                |                   |          |        |
|                                       | \$0-19,999        | 188            | 192.77            | 20.49    |                | 430.73            | 57.72    |                   | 383.22            | 60.17    |                        | 300.44            | 46.48    |                | 149.52            | 18.77    |                | 276.02            | 28.28    |                | 919.00            | 90.44    |        |
|                                       | \$20,000-39,999   | 227            | 187.98            | 19.45    | <.0001         | 348.93            | 38.09    | <.0001            | 317.04            | 29.69    | <.0001                 | 292.62            | 34.34    | <.0001         | 99.98             | 15.13    | 0.0554         | 228.31            | 19.18    | <.0001         | 753.75            | 52.74    | <.0001 |
|                                       | \$40,000-59,999   | 152            | 126.84            | 34.52    |                | 257.34            | 26.92    |                   | 211.13            | 27.83    |                        | 247.20            | 28.17    |                | 129.48            | 22.68    |                | 177.11            | 23.63    |                | 584.90            | 64.06    |        |
|                                       | \$60,000+         | 203            | 92.38             | 11.98    |                | 151.60            | 25.12    |                   | 123.17            | 19.81    |                        | 140.42            | 16.72    |                | 85.21             | 12.78    |                | 116.12            | 12.58    |                | 393.09            | 41.85    |        |
| Season                                |                   | 829            |                   |          |                |                   |          |                   |                   |          |                        |                   |          |                |                   |          |                |                   |          |                |                   |          |        |
|                                       | Winter            | 195            | 155.51            | 35.49    |                | 300.64            | 55.49    |                   | 245.73            | 47.16    |                        | 258.97            | 43.94    |                | 124.57            | 25.34    |                | 207.36            | 34.28    |                | 744.53            | 113.59   |        |
|                                       | Summer            | 286            | 128.94            | 32.01    | 0.3889         | 222.94            | 28.61    | 0.1221            | 198.95            | 32.55    | 0.1721                 | 222.74            | 34.28    | 0.7588         | 93.01             | 12.74    | 0.3598         | 161.86            | 23.41    | 0.2309         | 538.58            | 66.06    | 0.2693 |
|                                       | Fall              | 348            | 182.46            | 21.86    |                | 335.65            | 38.62    |                   | 301.12            | 34.08    |                        | 261.76            | 34.30    |                | 122.35            | 17.61    |                | 223.79            | 23.66    |                | 697.61            | 68.98    |        |
| Census Region                         |                   | 829            |                   |          |                |                   |          |                   |                   |          |                        |                   |          |                |                   |          |                |                   |          |                |                   |          |        |
|                                       | Northeast         | 155            | 154.74            | 22.86    |                | 219.86            | 38.38    |                   | 148.76            | 27.39    |                        | 183.59            | 24.58    |                | 107.14            | 20.03    |                | 159.24            | 23.63    |                | 467.08            | 58.42    |        |
|                                       | Midwest           | 196            | 165.97            | 27.05    | 0.9605         | 228.11            | 26.77    | 0.0510            | 280.76            | 30.88    | 0.0251                 | 326.08            | 57.96    | 0.0683         | 126.48            | 19.84    | 0.8096         | 207.59            | 23.84    | 0.4379         | 657.78            | 73.38    | 0.0496 |
|                                       | South             | 277            | 144.34            | 30.63    |                | 327.91            | 42.54    |                   | 282.85            | 33.77    |                        | 228.85            | 32.79    |                | 108.25            | 14.65    |                | 199.89            | 25.18    |                | 748.73            | 83.50    |        |
|                                       | West              | 201            | 153.97            | 11.64    |                | 334.33            | 44.23    |                   | 261.21            | 55.32    |                        | 267.62            | 40.70    |                | 103.61            | 15.56    |                | 210               | 20.41    |                | 660.73            | 60.74    |        |
| Urbanization                          |                   | 829            |                   |          |                |                   |          |                   |                   |          |                        |                   |          |                |                   |          |                |                   |          |                |                   |          |        |
|                                       | MSA >= 1 million  | 274            | 154.48            | 11.27    |                | 233.52            | 24.23    |                   | 215.29            | 22.15    |                        | 194.43            | 20.13    |                | 92.38             | 10.18    |                | 169.11            | 12.36    |                | 576.06            | 47.30    |        |
|                                       | MSA < 1 million   | 417            | 155.01            | 16.03    | 0.9894         | 272.78            | 24.99    | 0.1260            | 229.19            | 21.71    | 0.2420                 | 237.36            | 26.12    | 0.0458         | 97.79             | 10.65    | 0.0093         | 186.50            | 14.01    | 0.2982         | 614.73            | 36.07    | 0.2308 |
|                                       | Non-MSA PSU       | 138            | 147.83            | 45.50    |                | 356.60            | 63.95    |                   | 320.76            | 67.29    |                        | 341.47            | 68.58    |                | 175.48            | 30.91    |                | 248.16            | 48.48    |                | 806.28            | 141.20   |        |
| Household Construction Year           |                   | 829            |                   |          |                |                   |          |                   |                   |          |                        |                   |          |                |                   |          |                |                   |          |                |                   |          |        |
|                                       | 1978-1998         | 220            | 116.99            | 18.87    |                | 230.09            | 27.79    |                   | 213.87            | 21.64    |                        | 198.67            | 24.12    |                | 92.66             | 11.15    |                | 157.62            | 14.10    |                | 515.42            | 45.68    |        |
|                                       | 1960-1977         | 267            | 124.57            | 12.97    |                | 257.69            | 29.68    |                   | 211.40            | 23.63    |                        | 214.43            | 23.56    |                | 82.91             | 8.50     |                | 159.69            | 13.71    |                | 549.80            | 45.09    |        |
|                                       | 1946-1959         | 141            | 182.20            | 30.73    | 0.0092         | 270.85            | 48.85    | 0.0070            | 274.74            | 51.02    | 0.1355                 | 309.51            | 41.48    | 0.0268         | 121.23            | 19.75    | <.0001         | 225.18            | 28.73    | 0.0005         | 720.73            | 84.18    | <.0001 |
|                                       | 1940-1945         | 44             | 243.82            | 57.42    |                | 418.49            | 70.00    |                   | 372.71            | 100.41   |                        | 348.48            | 99.31    |                | 235.90            | 49.32    |                | 318.96            | 51.91    |                | 1003.11           | 130.20   |        |
|                                       | 1939 or earlier   | 157            | 257.80            | 37.92    |                | 405.37            | 62.40    |                   | 300.26            | 50.95    |                        | 314.56            | 50.15    |                | 172.04            | 21.96    |                | 287.34            | 33.5     |                | 961.79            | 100.09   |        |
| How many stories, including basement? |                   | 825            |                   |          |                |                   |          |                   |                   |          |                        |                   |          |                |                   |          |                |                   |          |                |                   |          |        |
|                                       | 1 story           | 330            | 125.40            | 25.12    |                | 308.88            | 40.89    |                   | 280.14            | 37.76    |                        | 257.21            | 32.28    |                | 113.34            | 15.39    |                | 194.83            | 25.78    |                | 674.37            | 84.10    |        |
|                                       | 2-3 stories       | 433            | 170.21            | 14.58    | 0.1013         | 263.04            | 25.87    | 0.5494            | 227.39            | 22.47    | 0.3895                 | 238.54            | 23.76    | 0.8642         | 108.46            | 12.23    | 0.8724         | 194.93            | 14.00    | 0.9247         | 637.55            | 41.26    | 0.6742 |
|                                       | 4 or more stories | 62             | 208.83            | 25.79    |                | 254.41            | 40.62    |                   | 205.85            | 45.65    |                        | 233.38            | 49.59    |                | 121.01            | 21.66    |                | 191.06            | 23.97    |                | 557.13            | 90.70    |        |

| Factor                               | Total          | Bedroom Bed    |                   |          | Bedroom Floor  |                   |          | Living Room Floor |                   |          | Living Room Upholstery |                   |          | Kitchen Floor  |                   |          | Geometric mean |                   |          | Maximum        |                   |          |
|--------------------------------------|----------------|----------------|-------------------|----------|----------------|-------------------|----------|-------------------|-------------------|----------|------------------------|-------------------|----------|----------------|-------------------|----------|----------------|-------------------|----------|----------------|-------------------|----------|
|                                      | Sample Size ** | Geometric Mean | Geometric mean SE | p-values | Geometric Mean | Geometric mean SE | p-values | Geometric Mean    | Geometric mean SE | p-values | Geometric Mean         | Geometric mean SE | p-values | Geometric Mean | Geometric mean SE | p-values | Geometric Mean | Geometric mean SE | p-values | Geometric Mean | Geometric mean SE | p-values |
| Main heating source in home?         | 826            |                |                   |          |                |                   |          |                   |                   |          |                        |                   |          |                |                   |          |                |                   |          |                |                   |          |
| Electric                             | 230            | 148.07         | 18.02             |          | 318.03         | 29.11             |          | 254.71            | 28.68             |          | 222.25                 | 31.21             |          | 99.49          | 9.25              |          | 195.12         | 14.83             |          | 666.75         | 51.46             |          |
| Gas                                  | 433            | 149.38         | 19.35             | 0.6756   | 261.62         | 30.33             | 0.3496   | 242.37            | 29.28             | 0.9052   | 255.13                 | 28.91             | 0.7294   | 110.12         | 13.49             | 0.4736   | 189.87         | 20.14             | 0.8043   | 631.73         | 60.91             | 0.9031   |
| Other/none                           | 163            | 174.72         | 27.51             |          | 275.48         | 43.92             |          | 234.10            | 37.84             |          | 256.49                 | 34.46             |          | 128.20         | 23.98             |          | 205.4          | 28.07             |          | 645.17         | 79.16             |          |
| Does home have air conditioning?     | 828            |                |                   |          |                |                   |          |                   |                   |          |                        |                   |          |                |                   |          |                |                   |          |                |                   |          |
| Air conditioning                     | 653            | 144.09         | 15.38             | 0.0619   | 261.05         | 19.51             | 0.0523   | 229.86            | 18.21             | 0.0544   | 238.58                 | 21.03             | 0.3677   | 105.52         | 8.76              | 0.1475   | 182.72         | 13.14             | 0.0429   | 613.54         | 40.72             | 0.0841   |
| No air conditioning                  | 175            | 201.99         | 31.09             |          | 379.62         | 65.63             |          | 317.27            | 50.31             |          | 275.52                 | 39.48             |          | 143.14         | 27.09             |          | 256            | 34.29             |          | 801.44         | 105.23            |          |
| Air filtration device in home?       | 810            |                |                   |          |                |                   |          |                   |                   |          |                        |                   |          |                |                   |          |                |                   |          |                |                   |          |
| Yes                                  | 101            | 165.84         | 25.11             | 0.5303   | 244.56         | 34.81             | 0.3633   | 173.43            | 29.41             | 0.0299   | 222.96                 | 34.45             | 0.5327   | 127.72         | 23.67             | 0.3631   | 186.46         | 21.30             | 0.5632   | 595.57         | 79.75             | 0.5767   |
| No                                   | 709            | 150.57         | 15.06             |          | 283.85         | 22.09             |          | 254.29            | 19.97             |          | 246.37                 | 20.49             |          | 107.66         | 8.54              |          | 194.04         | 13.4              |          | 645.83         | 39.71             |          |
| Dehumidifiers used in home?          | 813            |                |                   |          |                |                   |          |                   |                   |          |                        |                   |          |                |                   |          |                |                   |          |                |                   |          |
| Yes                                  | 130            | 191.03         | 31.54             | 0.3003   | 203.75         | 24.22             | 0.0172   | 175.32            | 23.15             | 0.0083   | 310.83                 | 62.52             | 0.1504   | 114.10         | 16.03             | 0.8626   | 188.37         | 18.65             | 0.6180   | 593.89         | 61.41             | 0.3959   |
| No                                   | 683            | 152.70         | 15.75             |          | 299.00         | 25.49             |          | 262.54            | 21.67             |          | 234.58                 | 17.53             |          | 110.92         | 9.74              |          | 199.18         | 14.46             |          | 660.79         | 43.29             |          |
| Any pets currently in house?         | 821            |                |                   |          |                |                   |          |                   |                   |          |                        |                   |          |                |                   |          |                |                   |          |                |                   |          |
| Yes                                  | 400            | 142.10         | 18.55             | 0.2292   | 286.40         | 22.01             | 0.7295   | 289.21            | 30.71             | 0.0103   | 266.58                 | 27.17             | 0.1586   | 124.76         | 12.74             | 0.0572   | 208.38         | 18.11             | 0.3629   | 679.82         | 52.54             | 0.3453   |
| No                                   | 421            | 166.85         | 17.98             |          | 276.61         | 26.39             |          | 214.42            | 18.33             |          | 228.81                 | 20.65             |          | 99.97          | 9.65              |          | 184.48         | 14.08             |          | 621.05         | 44.93             |          |
| How many people live in house?       | 829            |                |                   |          |                |                   |          |                   |                   |          |                        |                   |          |                |                   |          |                |                   |          |                |                   |          |
| 1 person                             | 125            | 200.01         | 29.81             |          | 326.65         | 56.18             |          | 262.00            | 42.88             |          | 284.28                 | 38.76             |          | 134.19         | 23.46             |          | 232.52         | 27.84             |          | 666.27         | 82.64             |          |
| 2 people                             | 253            | 176.69         | 27.50             |          | 269.61         | 28.02             |          | 242.47            | 21.70             |          | 246.25                 | 33.00             |          | 100.18         | 13.49             |          | 190.54         | 16.64             |          | 684.81         | 52.59             |          |
| 3 people                             | 171            | 106.29         | 14.51             | 0.0040   | 266.12         | 34.17             | 0.8605   | 216.48            | 24.87             | 0.7733   | 187.48                 | 17.12             | 0.0236   | 106.60         | 12.41             | 0.3953   | 172.52         | 13.19             | 0.2079   | 545.74         | 40.36             | 0.0885   |
| 4 people                             | 165            | 138.48         | 22.40             |          | 273.52         | 34.15             |          | 258.63            | 36.53             |          | 275.43                 | 34.25             |          | 124.54         | 14.12             |          | 201.29         | 19.26             |          | 677.97         | 60.52             |          |
| > 4 people                           | 115            | 143.04         | 22.31             |          | 273.96         | 46.33             |          | 252.71            | 54.65             |          | 259.93                 | 51.73             |          | 102.35         | 13.87             |          | 181.08         | 31.05             |          | 627.11         | 102.99            |          |
| Household has children under age 18? | 826            |                |                   |          |                |                   |          |                   |                   |          |                        |                   |          |                |                   |          |                |                   |          |                |                   |          |
| Yes child < 18                       | 397            | 127.25         | 14.68             | 0.0116   | 266.58         | 25.20             | 0.3938   | 248.92            | 30.12             | 0.8313   | 244.58                 | 24.23             | 0.9222   | 116.57         | 10.23             | 0.5695   | 189.66         | 16.68             | 0.4936   | 615.38         | 51.71             | 0.3007   |
| No child <18                         | 429            | 174.30         | 18.45             |          | 290.28         | 22.70             |          | 243.54            | 16.06             |          | 247.43                 | 23.88             |          | 108.85         | 11.39             |          | 199            | 12.72             |          | 669.38         | 38.30             |          |
| Household Race                       | 814            |                |                   |          |                |                   |          |                   |                   |          |                        |                   |          |                |                   |          |                |                   |          |                |                   |          |
| White                                | 622            | 147.17         | 15.95             |          | 253.94         | 20.99             |          | 232.86            | 20.59             |          | 261.31                 | 23.92             |          | 111.70         | 10.42             |          | 190.91         | 14.59             |          | 614.46         | 41.02             |          |
| Black                                | 116            | 201.82         | 29.69             | 0.1834   | 472.31         | 66.52             | 0.0010   | 387.17            | 65.75             | 0.0328   | 161.43                 | 26.24             | 0.0563   | 137.20         | 11.71             | 0.0681   | 227.78         | 22.73             | 0.0672   | 830.46         | 105.87            | 0.1260   |
| Other                                | 76             | 151.48         | 33.90             |          | 386.18         | 69.39             |          | 201.87            | 55.44             |          | 222.99                 | 42.12             |          | 83.46          | 18.24             |          | 189.77         | 27.83             |          | 730.99         | 96.35             |          |
| Household Ethnicity                  | 820            |                |                   |          |                |                   |          |                   |                   |          |                        |                   |          |                |                   |          |                |                   |          |                |                   |          |
| Hispanic                             | 85             | 196.82         | 36.96             | 0.2243   | 390.48         | 86.14             | 0.1117   | 248.94            | 66.16             | 0.9016   | 270.78                 | 76.18             | 0.6948   | 108.14         | 17.43             | 0.8425   | 219.57         | 35.65             | 0.2356   | 865.82         | 124.94            | 0.0336   |
| Non-hispanic                         | 735            | 150.41         | 15.12             |          | 269.09         | 19.80             |          | 241.06            | 17.20             |          | 241.46                 | 19.24             |          | 112.18         | 9.73              |          | 191.99         | 13.05             |          | 624.75         | 37.04             |          |

| Factor                                          | Total          | Bedroom Bed    |                   |          | Bedroom Floor  |                   |          | Living Room Floor |                   |          | Living Room Upholstery |                   |          | Kitchen Floor  |                   |          | Geometric mean |                   |          | Maximum        |                   |          |
|-------------------------------------------------|----------------|----------------|-------------------|----------|----------------|-------------------|----------|-------------------|-------------------|----------|------------------------|-------------------|----------|----------------|-------------------|----------|----------------|-------------------|----------|----------------|-------------------|----------|
|                                                 | Sample Size ** | Geometric Mean | Geometric mean SE | p-values | Geometric Mean | Geometric mean SE | p-values | Geometric Mean    | Geometric mean SE | p-values | Geometric Mean         | Geometric mean SE | p-values | Geometric Mean | Geometric mean SE | p-values | Geometric Mean | Geometric mean SE | p-values | Geometric Mean | Geometric mean SE | p-values |
| Education                                       | 791            |                |                   |          |                |                   |          |                   |                   |          |                        |                   |          |                |                   |          |                |                   |          |                |                   |          |
| Less Than High School                           | 71             | 148.14         | 27.77             |          | 289.17         | 67.80             |          | 335.17            | 97.77             |          | 331.08                 | 51.65             |          | 94.54          | 23.56             |          | 214.45         | 36.05             |          | 752.36         | 132.94            |          |
| High School                                     | 176            | 220.41         | 21.14             | <.0001   | 306.72         | 43.78             | 0.5003   | 320.90            | 44.71             | 0.0190   | 345.09                 | 38.56             | 0.0003   | 124.42         | 20.64             | 0.4958   | 234.65         | 23.76             | 0.0115   | 759.88         | 80.67             | 0.0242   |
| College                                         | 544            | 133.02         | 14.97             |          | 256.36         | 18.34             |          | 209.80            | 15.14             |          | 209.26                 | 19.24             |          | 104.63         | 8.32              |          | 175.01         | 10.43             |          | 578.55         | 27.75             |          |
| Does anyone in the home smoke cigarettes?       | 825            |                |                   |          |                |                   |          |                   |                   |          |                        |                   |          |                |                   |          |                |                   |          |                |                   |          |
| Yes                                             | 332            | 186.25         | 18.66             | 0.0220   | 331.98         | 31.88             | 0.0131   | 323.03            | 33.40             | <.0001   | 280.35                 | 32.72             | 0.0548   | 125.74         | 12.72             | 0.0980   | 233.83         | 17.92             | <.0001   | 790.54         | 59.57             | 0.0003   |
| No                                              | 493            | 135.58         | 16.35             |          | 249.83         | 20.56             |          | 205.55            | 17.07             |          | 228.88                 | 16.83             |          | 103.07         | 10.07             |          | 173.41         | 12.63             |          | 567.71         | 37.3              |          |
| Last time kitchen floor/carpet was cleaned?     | 810            |                |                   |          |                |                   |          |                   |                   |          |                        |                   |          |                |                   |          |                |                   |          |                |                   |          |
| < One Week                                      | 503            | 160.83         | 18.88             | 0.2343   | 270.54         | 27.28             | 0.9209   | 215.7             | 23.91             | 0.0623   | 243.16                 | 23.13             | 0.7905   | 106.47         | 9.96              | 0.3896   | 187.82         | 15.63             | 0.6518   | 654.43         | 46.17             | 0.4118   |
| One week or >                                   | 307            | 135.81         | 13.95             |          | 274.35         | 23.25             |          | 282.34            | 23.96             |          | 236.06                 | 21.38             |          | 117.28         | 11.52             |          | 196.96         | 14.02             |          | 604.87         | 43.97             |          |
| Last time living room floor/carpet was cleaned? | 797            |                |                   |          |                |                   |          |                   |                   |          |                        |                   |          |                |                   |          |                |                   |          |                |                   |          |
| < One Week                                      | 484            | 149.22         | 19.63             | 0.9910   | 254.15         | 24.91             | 0.3904   | 213.82            | 18.39             | 0.0101   | 233.42                 | 20.28             | 0.4606   | 101.78         | 8.10              | 0.2052   | 176.77         | 13.48             | 0.1302   | 612.52         | 43.26             | 0.4743   |
| One week or >                                   | 313            | 149.47         | 11.23             |          | 289.53         | 28.61             |          | 281.46            | 27.64             |          | 252.05                 | 24.38             |          | 117.41         | 12.2              |          | 207.6          | 13.84             |          | 652.45         | 42.79             |          |
| Last time bedroom floor/carpet was cleaned?     | 771            |                |                   |          |                |                   |          |                   |                   |          |                        |                   |          |                |                   |          |                |                   |          |                |                   |          |
| < One Week                                      | 396            | 154.73         | 20.00             | 0.4872   | 244.79         | 24.96             | 0.1938   | 213.19            | 20.10             | 0.0834   | 234.23                 | 21.05             | 0.8225   | 106.04         | 8.75              | 0.5534   | 177.54         | 14.26             | 0.4355   | 614.15         | 47.56             | 0.6690   |
| One week or >                                   | 375            | 141.27         | 12.89             |          | 292.89         | 26.82             |          | 264.59            | 27.68             |          | 240.24                 | 24.3              |          | 113.88         | 13.13             |          | 199.44         | 16.36             |          | 641.62         | 48.45             |          |

\*\* Actual sample size of available dust weight at each location may be less.

Table S2. Factors entered into linear regression models predicting dust weight for each location.

| <b>Bedroom Dust Weight (mg) Summarized Levels of Factors</b> |                   |                    |                   |          |        |
|--------------------------------------------------------------|-------------------|--------------------|-------------------|----------|--------|
| <b>Factor</b>                                                | <b>Total</b>      | <b>Bedroom Bed</b> |                   |          |        |
|                                                              | Sample Size<br>** | Geometric Mean     | Geometric mean SE | p-values |        |
| <b>Household Income by 20K</b>                               |                   | <b>723</b>         |                   |          |        |
|                                                              | \$0-19,999        | 169                | 192.77            | 20.49    | 0.0008 |
|                                                              | \$20,000-39,999   | 219                | 187.98            | 19.45    |        |
|                                                              | \$40,000-59,999   | 143                | 126.874           | 34.52    |        |
|                                                              | \$60,000+         | 192                | 92.38             | 11.98    |        |
| <b>Season</b>                                                |                   | <b>784</b>         |                   |          |        |
|                                                              | Winter            | 189                | 155.51            | 35.49    | 0.4515 |
|                                                              | Summer            | 276                | 128.94            | 32.01    |        |
|                                                              | Fall              | 319                | 182.46            | 21.86    |        |
| <b>Census Region</b>                                         |                   | <b>781</b>         |                   |          |        |
|                                                              | Northeast         | 148                | 154.74            | 22.86    | 0.9355 |
|                                                              | Midwest           | 184                | 165.97            | 27.05    |        |
|                                                              | South             | 265                | 144.34            | 30.63    |        |
|                                                              | West              | 184                | 153.97            | 11.64    |        |
| <b>Household Construction Year</b>                           |                   | <b>781</b>         |                   |          |        |
|                                                              | 1978-1998         | 210                | 116.99            | 18.87    | 0.0334 |
|                                                              | 1960-1977         | 254                | 124.57            | 12.97    |        |
|                                                              | 1946-1959         | 131                | 182.20            | 30.73    |        |
|                                                              | 1940-1945         | 41                 | 243.82            | 57.42    |        |
|                                                              | 1939 or earlier   | 145                | 257.80            | 37.92    |        |
| <b>How many stories, including basement?</b>                 |                   | <b>778</b>         |                   |          |        |
|                                                              | 1 story           | 314                | 125.74            | 25.12    | 0.3827 |
|                                                              | 2-3 stories       | 412                | 170.21            | 14.58    |        |
|                                                              | 4 or more stories | 52                 | 208.83            | 25.79    |        |
| <b>Main heating source in home?</b>                          |                   | <b>778</b>         |                   |          |        |
|                                                              | Electric          | 219                | 148.07            | 18.02    | 0.9754 |
|                                                              | Gas               | 407                | 149.38            | 19.35    |        |
|                                                              | Other/none        | 152                | 174.72            | 27.51    |        |

|                                           |                       |     |        |       |        |
|-------------------------------------------|-----------------------|-----|--------|-------|--------|
| Air conditioning system in home?          |                       | 780 |        |       |        |
|                                           | Air conditioning      | 620 | 144.09 | 15.38 | 0.0502 |
|                                           | No air conditioning   | 160 | 201.99 | 31.09 |        |
| Any pets currently in house?              |                       | 773 |        |       |        |
|                                           | Yes                   | 378 | 142.10 | 18.55 | 0.2403 |
|                                           | No                    | 395 | 166.85 | 17.98 |        |
| Air filtration device in home?            |                       | 764 |        |       |        |
|                                           | Yes                   | 94  | 165.84 | 25.11 | 0.3186 |
|                                           | No                    | 670 | 150.57 | 15.06 |        |
| Dehumidifiers used in home?               |                       | 765 |        |       |        |
|                                           | Yes                   | 128 | 191.03 | 31.54 | 0.2008 |
|                                           | No                    | 637 | 152.70 | 15.75 |        |
| How many people live in house?            |                       | 781 |        |       |        |
|                                           | 1 person              | 109 | 200.01 | 29.81 | 0.0019 |
|                                           | 2 people              | 236 | 176.69 | 27.50 |        |
|                                           | 3 people              | 162 | 106.29 | 14.51 |        |
|                                           | 4 people              | 161 | 138.48 | 22.40 |        |
|                                           | > 4 people            | 113 | 143.04 | 22.31 |        |
| Does anyone in the home smoke cigarettes? |                       | 777 |        |       |        |
|                                           | Yes                   | 312 | 186.25 | 18.66 | 0.2071 |
|                                           | No                    | 465 | 135.58 | 16.35 |        |
| Household Race                            |                       | 766 |        |       |        |
|                                           | White                 | 588 | 147.17 | 15.95 | 0.0554 |
|                                           | Black                 | 108 | 201.82 | 29.69 |        |
|                                           | Other                 | 70  | 151.48 | 33.90 |        |
| Household Ethnicity                       |                       | 773 |        |       |        |
|                                           | Hispanic              | 81  | 196.82 | 36.96 | 0.7866 |
|                                           | Non-hispanic          | 692 | 150.41 | 15.12 |        |
| Education                                 |                       | 745 |        |       |        |
|                                           | Less Than High School | 65  | 148.14 | 27.77 | 0.0147 |
|                                           | High School           | 165 | 220.41 | 21.14 |        |
|                                           | College               | 515 | 133.02 | 14.97 |        |

|                                                |                          |     |        |        |        |  |
|------------------------------------------------|--------------------------|-----|--------|--------|--------|--|
| Urbanization                                   |                          | 781 |        |        |        |  |
|                                                | MSA >= 1 million         | 250 | 154.48 | 11.27  |        |  |
|                                                | MSA < 1 million          | 400 | 155.01 | 16.03  | 0.9818 |  |
|                                                | Non-MSA PSU              | 131 | 147.83 | 45.50  |        |  |
| Household has children under age 18?           |                          | 778 |        |        |        |  |
|                                                | Yes child < 18           | 386 | 127.25 | 14.68  |        |  |
|                                                | No child <18             | 392 | 174.30 | 18.45  | 0.0837 |  |
| Bedroom Floor                                  |                          | 749 |        |        |        |  |
|                                                | Carpeted                 | 565 | 143.34 | 13.4   |        |  |
|                                                | Smooth and Cleanable     | 174 | 168.53 | 26.15  | 0.0038 |  |
|                                                | Not Smooth and Cleanable | 10  | 585.56 | 246.33 |        |  |
| Bedroom Mat                                    |                          | 765 |        |        |        |  |
|                                                | No                       | 747 | 151.02 | 13.87  |        |  |
|                                                | Yes                      | 18  | 257.59 | 97.19  | 0.1191 |  |
| Bedroom Area Rug                               |                          | 765 |        |        |        |  |
|                                                | No                       | 690 | 149.13 | 15.15  |        |  |
|                                                | Yes                      | 75  | 194.68 | 42.59  | 0.1963 |  |
| Bedroom Wall-to-Wall Carpet                    |                          | 765 |        |        |        |  |
|                                                | No                       | 189 | 195.75 | 25.58  |        |  |
|                                                | Yes                      | 576 | 142.43 | 14.57  | 0.0167 |  |
| No Carpet in Bedroom                           |                          | 765 |        |        |        |  |
|                                                | No                       | 647 | 146.59 | 14.53  |        |  |
|                                                | Yes                      | 118 | 204.61 | 30.22  | 0.0399 |  |
| Observed impremeable pillow or mattres covers? |                          | 757 |        |        |        |  |
|                                                | Yes                      | 194 | 69.31  | 16.3   |        |  |
|                                                | No                       | 563 | 194.73 | 16.94  | 0.0002 |  |
| Use impermeable pillow or mattress covers?     |                          | 773 |        |        |        |  |
|                                                | Yes                      | 30  | 138.74 | 38.97  |        |  |
|                                                | No                       | 743 | 153.15 | 14.57  | 0.9023 |  |
| Last time bedroom floor/carpet was cleaned?    |                          | 737 |        |        |        |  |
|                                                | < One Week               | 377 | 154.73 | 20.00  |        |  |
|                                                | One week or >            | 360 | 141.27 | 12.89  | 0.7451 |  |

|                                        |         |     |        |       |        |
|----------------------------------------|---------|-----|--------|-------|--------|
| Bedding washed within last week        |         | 729 |        |       |        |
|                                        | Yes     | 523 | 144.61 | 19.55 | 0.3398 |
|                                        | No      | 206 | 179.17 | 18.59 |        |
| Water temperature when washing bedding |         | 736 |        |       |        |
|                                        | Hot     | 249 | 193.18 | 24.66 | 0.0852 |
|                                        | Warm    | 348 | 139.15 | 15.82 |        |
|                                        | Cold    | 139 | 136.56 | 18.62 |        |
| Temperature in Bedroom (F)             |         | 763 |        |       |        |
|                                        | < 65    | 30  | 171.52 | 40.11 | 0.7097 |
|                                        | 65 - 74 | 294 | 169.77 | 18.59 |        |
|                                        | 75 - 84 | 389 | 148.05 | 17.59 |        |
|                                        | > = 84  | 50  | 97.01  | 68.46 |        |
| Humidity in Bedroom (%)                |         | 768 |        |       |        |
|                                        | < 40    | 136 | 174.73 | 68.3  | 0.3677 |
|                                        | 40 - 49 | 247 | 163.89 | 18.64 |        |
|                                        | 50 - 59 | 176 | 168.12 | 19.74 |        |
|                                        | 60 - 69 | 143 | 126.55 | 15.25 |        |
|                                        | > = 70  | 66  | 97.47  | 23.84 |        |
| Observed Moisture in the Bedroom       |         | 774 |        |       |        |
|                                        | Yes     | 59  | 375.72 | 98.25 | 0.0028 |
|                                        | No      | 715 | 142.65 | 14.05 |        |
| Stuffed Animals found on the bed       |         | 756 |        |       |        |
|                                        | Yes     | 190 | 103.79 | 12.21 | 0.0001 |
|                                        | No      | 566 | 176.02 | 17.25 |        |
| Carpet In the Bedroom                  |         | 765 |        |       |        |
|                                        | Yes     | 644 | 146.67 | 14.55 | 0.0446 |
|                                        | No      | 121 | 202.23 | 29.58 |        |

\*\* Actual sample size of available dust weight at each location may be less.



## Bedroom Floor Dust Weight (mg) Summarized by Levels of Factors

| <b>Factor</b>                                | Total               | <b>Bedroom Floor</b> |                   |          |        |
|----------------------------------------------|---------------------|----------------------|-------------------|----------|--------|
|                                              | Sample Size<br>**   | Geometric Mean       | Geometric mean SE | p-values |        |
| <b>Household Income by 20K</b>               |                     | <b>725</b>           |                   |          |        |
|                                              | \$0-19,999          | 168                  | 430.73            | 57.72    | <.0001 |
|                                              | \$20,000-39,999     | 217                  | 348.93            | 38.09    |        |
|                                              | \$40,000-59,999     | 146                  | 257.34            | 26.92    |        |
|                                              | \$60,000+           | 194                  | 151.60            | 25.12    |        |
| <b>Season</b>                                |                     | <b>784</b>           |                   |          |        |
|                                              | Winter              | 188                  | 300.64            | 55.49    | 0.1221 |
|                                              | Summer              | 276                  | 222.94            | 28.61    |        |
|                                              | Fall                | 320                  | 335.65            | 38.62    |        |
| <b>Census Region</b>                         |                     | <b>784</b>           |                   |          |        |
|                                              | Northeast           | 148                  | 219.86            | 38.38    | 0.0510 |
|                                              | Midwest             | 184                  | 228.11            | 26.77    |        |
|                                              | South               | 269                  | 327.91            | 42.54    |        |
|                                              | West                | 183                  | 334.33            | 44.23    |        |
| <b>Household Construction Year</b>           |                     | <b>784</b>           |                   |          |        |
|                                              | 1978-1998           | 213                  | 230.09            | 27.79    | 0.0070 |
|                                              | 1960-1977           | 255                  | 257.69            | 29.68    |        |
|                                              | 1946-1959           | 131                  | 270.85            | 48.85    |        |
|                                              | 1940-1945           | 41                   | 418.49            | 70.00    |        |
|                                              | 1939 or earlier     | 144                  | 405.37            | 62.40    |        |
| <b>How many stories, including basement?</b> |                     | <b>781</b>           |                   |          |        |
|                                              | 1 story             | 311                  | 308.88            | 40.89    | 0.5494 |
|                                              | 2-3 stories         | 418                  | 263.04            | 25.87    |        |
|                                              | 4 or more stories   | 52                   | 254.41            | 40.62    |        |
| <b>Main heating source in home?</b>          |                     | <b>781</b>           |                   |          |        |
|                                              | Electric            | 220                  | 318.03            | 29.11    | 0.3496 |
|                                              | Gas                 | 408                  | 261.62            | 30.33    |        |
|                                              | Other/none          | 153                  | 275.48            | 43.92    |        |
| <b>Does home have air conditioning?</b>      |                     | <b>783</b>           |                   |          |        |
|                                              | Air conditioning    | 624                  | 261.05            | 19.51    | 0.0523 |
|                                              | No air conditioning | 159                  | 379.62            | 65.63    |        |
| <b>Any pets currently in house?</b>          |                     | <b>776</b>           |                   |          |        |
|                                              | Yes                 | 382                  | 286.40            | 22.01    | 0.7295 |
|                                              | No                  | 394                  | 276.61            | 26.39    |        |

|                                           |              |     |        |       |        |
|-------------------------------------------|--------------|-----|--------|-------|--------|
| Air filtration device in home?            |              | 766 |        |       |        |
|                                           | Yes          | 98  | 244.56 | 34.81 | 0.3633 |
|                                           | No           | 668 | 283.85 | 22.09 |        |
| Dehumidifiers used in home?               |              | 768 |        |       |        |
|                                           | Yes          | 127 | 203.75 | 24.22 | 0.0172 |
|                                           | No           | 641 | 299.00 | 25.49 |        |
| How many people live in house?            |              | 784 |        |       |        |
|                                           | 1 person     | 110 | 326.65 | 56.18 | 0.8605 |
|                                           | 2 people     | 240 | 269.61 | 28.02 |        |
|                                           | 3 people     | 164 | 266.12 | 34.17 |        |
|                                           | 4 people     | 159 | 273.52 | 34.15 |        |
|                                           | > 4 people   | 111 | 273.96 | 46.33 |        |
| Does anyone in the home smoke cigarettes? |              | 780 |        |       |        |
|                                           | Yes          | 313 | 331.98 | 31.88 | 0.0131 |
|                                           | No           | 467 | 249.83 | 20.56 |        |
| Household Race                            |              | 770 |        |       |        |
|                                           | White        | 590 | 253.94 | 20.99 | 0.0010 |
|                                           | Black        | 108 | 472.31 | 66.52 |        |
|                                           | Other        | 72  | 386.18 | 69.39 |        |
| Household Ethnicity                       |              | 776 |        |       |        |
|                                           | Hispanic     | 80  | 390.48 | 86.14 | 0.1117 |
|                                           | Non-hispanic | 696 | 269.09 | 19.80 |        |

|                                             |                          |     |        |        |        |  |
|---------------------------------------------|--------------------------|-----|--------|--------|--------|--|
| Education                                   |                          | 748 |        |        |        |  |
|                                             | Less Than High School    | 63  | 289.17 | 67.80  |        |  |
|                                             | High School              | 167 | 306.72 | 43.78  | 0.5003 |  |
|                                             | College                  | 518 | 256.36 | 18.34  |        |  |
| Urbanization                                |                          | 784 |        |        |        |  |
|                                             | MSA >= 1 million         | 256 | 233.52 | 24.23  |        |  |
|                                             | MSA < 1 million          | 400 | 272.78 | 24.99  | 0.1260 |  |
|                                             | Non-MSA PSU              | 128 | 356.60 | 63.95  |        |  |
| Household has children under age 18?        |                          | 781 |        |        |        |  |
|                                             | Yes child < 18           | 382 | 266.58 | 25.20  |        |  |
|                                             | No child <18             | 399 | 290.28 | 22.70  | 0.3938 |  |
| Bedroom Floor                               |                          | 753 |        |        |        |  |
|                                             | Carpeted                 | 568 | 314.13 | 23.61  |        |  |
|                                             | Smooth and Cleanable     | 175 | 176.62 | 26.94  | 0.0012 |  |
|                                             | Not Smooth and Cleanable | 10  | 494.01 | 231.49 |        |  |
| Bedroom Mat                                 |                          | 769 |        |        |        |  |
|                                             | No                       | 751 | 277.06 | 19.38  |        |  |
|                                             | Yes                      | 18  | 390.10 | 166.72 | 0.4120 |  |
| Bedroom Area Rug                            |                          | 769 |        |        |        |  |
|                                             | No                       | 693 | 267.85 | 19.85  |        |  |
|                                             | Yes                      | 76  | 409.75 | 68.77  | 0.0140 |  |
| Bedroom Wall-to-Wall Carpet                 |                          | 769 |        |        |        |  |
|                                             | No                       | 187 | 210.60 | 27.84  |        |  |
|                                             | Yes                      | 582 | 303.52 | 25.34  | 0.0191 |  |
| No Carpet in Bedroom                        |                          | 769 |        |        |        |  |
|                                             | No                       | 654 | 310.41 | 24.82  |        |  |
|                                             | Yes                      | 115 | 137.04 | 24.13  | 0.0001 |  |
| Last time bedroom floor/carpet was cleaned? |                          | 741 |        |        |        |  |
|                                             | < One Week               | 383 | 244.79 | 24.96  |        |  |
|                                             | One week or >            | 358 | 292.89 | 26.82  | 0.1938 |  |

|                                  |         |     |        |        |        |
|----------------------------------|---------|-----|--------|--------|--------|
| Temperature in Bedroom (F)       |         | 768 |        |        |        |
|                                  | < 65    | 31  | 334.38 | 66.31  | 0.8075 |
|                                  | 65 - 74 | 295 | 277.60 | 28.03  |        |
|                                  | 75 - 84 | 391 | 274.26 | 26.79  |        |
|                                  | > = 84  | 51  | 284.46 | 65.83  |        |
| Humidity in Bedroom (%)          |         | 772 |        |        |        |
|                                  | < 40    | 138 | 452.49 | 84     | 0.0157 |
|                                  | 40 - 49 | 246 | 278.29 | 24.94  |        |
|                                  | 50 - 59 | 174 | 252.14 | 33.31  |        |
|                                  | 60 - 69 | 147 | 203.24 | 23.56  |        |
|                                  | > = 70  | 67  | 245.14 | 35     |        |
| Observed Moisture in the Bedroom |         | 777 |        |        |        |
|                                  | Yes     | 55  | 583.07 | 151.34 | 0.0033 |
|                                  | No      | 722 | 266.03 | 18.03  |        |
| Carpet In the Bedroom            |         | 769 |        |        |        |
|                                  | Yes     | 651 | 310.50 | 24.83  | <.0001 |
|                                  | No      | 118 | 139.52 | 23.27  |        |

\*\* Actual sample size of available dust weight at each location may be less.

| <b>Kitchen Floor Dust Weight (mg) Summarized by Levels of Factors</b> |                   |                      |                   |          |        |
|-----------------------------------------------------------------------|-------------------|----------------------|-------------------|----------|--------|
| <b>Factor</b>                                                         | <b>Total</b>      | <b>Kitchen Floor</b> |                   |          |        |
|                                                                       | Sample Size<br>** | Geometric Mean       | Geometric mean SE | p-values |        |
| <b>Household Income by 20K</b>                                        |                   | <b>736</b>           |                   |          |        |
|                                                                       | \$0-19,999        | 175                  | 149.52            | 18.77    | 0.0249 |
|                                                                       | \$20,000-39,999   | 218                  | 99.98             | 15.13    |        |
|                                                                       | \$40,000-59,999   | 149                  | 129.48            | 22.68    |        |
|                                                                       | \$60,000+         | 194                  | 85.21             | 12.78    |        |
| <b>Season</b>                                                         |                   | <b>794</b>           |                   |          |        |
|                                                                       | Winter            | 189                  | 124.57            | 25.34    | 0.3697 |
|                                                                       | Summer            | 275                  | 93.01             | 12.74    |        |
|                                                                       | Fall              | 330                  | 122.35            | 17.61    |        |
| <b>Census Region</b>                                                  |                   | <b>794</b>           |                   |          |        |
|                                                                       | Northeast         | 148                  | 107.14            | 20.03    | 0.8854 |
|                                                                       | Midwest           | 189                  | 126.48            | 19.84    |        |
|                                                                       | South             | 268                  | 108.25            | 14.65    |        |
|                                                                       | West              | 189                  | 103.61            | 15.56    |        |
| <b>Household Construction Year</b>                                    |                   | <b>794</b>           |                   |          |        |
|                                                                       | 1978-1998         | 210                  | 92.66             | 11.15    | <.0001 |
|                                                                       | 1960-1977         | 254                  | 82.91             | 8.50     |        |
|                                                                       | 1946-1959         | 132                  | 121.23            | 19.75    |        |
|                                                                       | 1940-1945         | 44                   | 235.90            | 49.32    |        |
|                                                                       | 1939 or earlier   | 154                  | 172.04            | 21.96    |        |
| <b>How many stories, including basement?</b>                          |                   | <b>790</b>           |                   |          |        |
|                                                                       | 1 story           | 315                  | 113.34            | 15.39    | 0.7307 |
|                                                                       | 2-3 stories       | 417                  | 108.46            | 12.23    |        |
|                                                                       | 4 or more stories | 58                   | 121.01            | 21.66    |        |

|                                           |                     |     |        |       |        |
|-------------------------------------------|---------------------|-----|--------|-------|--------|
| Main heating source in home?              |                     | 791 |        |       |        |
|                                           | Electric            | 216 | 99.49  | 9.25  |        |
|                                           | Gas                 | 420 | 110.12 | 13.49 | 0.4541 |
|                                           | Other/none          | 155 | 128.20 | 23.98 |        |
| Does home have air conditioning?          |                     | 793 |        |       |        |
|                                           | Air conditioning    | 626 | 105.52 | 8.76  |        |
|                                           | No air conditioning | 167 | 143.14 | 27.09 | 0.1345 |
| Any pets currently in house?              |                     | 786 |        |       |        |
|                                           | Yes                 | 384 | 124.76 | 12.74 |        |
|                                           | No                  | 402 | 99.97  | 9.65  | 0.0345 |
| Air filtration device in home?            |                     | 775 |        |       |        |
|                                           | Yes                 | 93  | 127.72 | 23.67 |        |
|                                           | No                  | 682 | 107.66 | 8.54  | 0.2221 |
| Dehumidifiers used in home?               |                     | 779 |        |       |        |
|                                           | Yes                 | 125 | 114.10 | 16.03 |        |
|                                           | No                  | 654 | 110.92 | 9.74  | 0.8697 |
| How many people live in house?            |                     | 794 |        |       |        |
|                                           | 1 person            | 116 | 134.19 | 23.46 |        |
|                                           | 2 people            | 242 | 100.18 | 13.49 |        |
|                                           | 3 people            | 162 | 106.60 | 12.41 | 0.5486 |
|                                           | 4 people            | 162 | 124.54 | 14.12 |        |
|                                           | > 4 people          | 112 | 102.35 | 13.87 |        |
| Does anyone in the home smoke cigarettes? |                     | 790 |        |       |        |
|                                           | Yes                 | 319 | 125.74 | 12.72 |        |
|                                           | No                  | 471 | 103.07 | 10.07 | 0.4195 |
| Household Race                            |                     | 780 |        |       |        |
|                                           | White               | 597 | 111.70 | 10.42 |        |
|                                           | Black               | 110 | 137.20 | 11.71 | 0.0255 |
|                                           | Other               | 73  | 83.46  | 18.24 |        |
| Household Ethnicity                       |                     | 785 |        |       |        |
|                                           | Hispanic            | 83  | 108.14 | 17.43 |        |
|                                           | Non-hispanic        | 702 | 112.18 | 9.73  | 0.2629 |

|                                             |                          |     |        |       |        |  |
|---------------------------------------------|--------------------------|-----|--------|-------|--------|--|
| Education                                   |                          | 756 |        |       |        |  |
|                                             | Less Than High School    | 66  | 94.54  | 23.56 |        |  |
|                                             | High School              | 171 | 124.42 | 20.64 | 0.2529 |  |
|                                             | College                  | 519 | 104.63 | 8.32  |        |  |
| Urbanization                                |                          | 794 |        |       |        |  |
|                                             | MSA >= 1 million         | 266 | 92.38  | 10.18 |        |  |
|                                             | MSA < 1 million          | 395 | 97.79  | 10.65 | 0.0029 |  |
|                                             | Non-MSA PSU              | 133 | 175.48 | 30.91 |        |  |
| Household has children under age 18?        |                          | 791 |        |       |        |  |
|                                             | Yes child < 18           | 383 | 116.57 | 10.23 |        |  |
|                                             | No child <18             | 408 | 108.85 | 11.39 | 0.5856 |  |
| Kitchen Floor                               |                          | 770 |        |       |        |  |
|                                             | Carpeted                 | 56  | 349.94 | 65.84 |        |  |
|                                             | Smooth and Cleanable     | 686 | 99.68  | 7.14  | <.0001 |  |
|                                             | Not Smooth and Cleanable | 28  | 127.19 | 59.77 |        |  |
| Kitchen Mat                                 |                          | 781 |        |       |        |  |
|                                             | No                       | 688 | 106.02 | 8.45  |        |  |
|                                             | Yes                      | 93  | 154.06 | 26.68 | 0.2142 |  |
| Kitchen Area Rug                            |                          | 781 |        |       |        |  |
|                                             | No                       | 714 | 104.28 | 8.22  |        |  |
|                                             | Yes                      | 67  | 207.08 | 41.25 | 0.0005 |  |
| Kitchen Wall-to-Wall Carpet                 |                          | 781 |        |       |        |  |
|                                             | No                       | 739 | 102.22 | 7.08  |        |  |
|                                             | Yes                      | 42  | 415.12 | 75.34 | <.0001 |  |
| No Carpet in Kitchen                        |                          | 781 |        |       |        |  |
|                                             | No                       | 186 | 192.97 | 24.58 |        |  |
|                                             | Yes                      | 595 | 92.08  | 6.76  | <.0001 |  |
| Last time kitchen floor/carpet was cleaned? |                          | 778 |        |       |        |  |
|                                             | < One Week               | 482 | 106.47 | 9.96  |        |  |
|                                             | One week or >            | 296 | 117.28 | 11.52 | 0.3101 |  |

|                                  |         |     |        |       |        |
|----------------------------------|---------|-----|--------|-------|--------|
| Temperature in Kitchen (F)       |         | 785 |        |       |        |
|                                  | < 65    | 62  | 146.84 | 36.27 | 0.9527 |
|                                  | 65 - 74 | 302 | 108.12 | 14.58 |        |
|                                  | 75 - 84 | 354 | 111.61 | 11.94 |        |
|                                  | > = 84  | 67  | 101.13 | 21.59 |        |
| Humidity in Kitchen (%)          |         | 789 |        |       |        |
|                                  | < 40    | 166 | 160.39 | 22.94 | 0.0072 |
|                                  | 40 - 49 | 236 | 108.33 | 11.78 |        |
|                                  | 50 - 59 | 191 | 104.81 | 13.57 |        |
|                                  | 60 - 69 | 123 | 84.43  | 12.73 |        |
|                                  | > = 70  | 73  | 101.67 | 24.74 |        |
| Observed Moisture in the Kitchen |         | 793 |        |       |        |
|                                  | Yes     | 156 | 218.84 | 46.13 | 0.0012 |
|                                  | No      | 637 | 95.41  | 7.48  |        |
| Carpet In the Kitchen            |         | 781 |        |       |        |
|                                  | Yes     | 191 | 194.13 | 24.04 | <.0001 |
|                                  | No      | 590 | 91.31  | 6.68  |        |

\*\* Actual sample size of available dust weight at each location may be less.



## Living Room Floor Dust Weight (mg) Summarized by Levels of Factors

| <b>Factor</b>                                | <b>Total</b>      | <b>Living Room Floor</b> |                   |          |
|----------------------------------------------|-------------------|--------------------------|-------------------|----------|
|                                              | Sample Size<br>** | Geometric Mean           | Geometric mean SE | p-values |
| <b>Household Income by 20K</b>               |                   |                          |                   |          |
| \$0-19,999                                   | 175               | 383.22                   | 60.17             | <.0001   |
| \$20,000-39,999                              | 216               | 317.04                   | 29.69             |          |
| \$40,000-59,999                              | 141               | 211.13                   | 27.83             |          |
| \$60,000+                                    | 189               | 123.17                   | 19.81             |          |
| <b>Season</b>                                |                   |                          |                   |          |
| Winter                                       | 181               | 245.73                   | 47.16             | 0.2332   |
| Summer                                       | 275               | 198.95                   | 32.55             |          |
| Fall                                         | 323               | 301.12                   | 34.08             |          |
| <b>Census Region</b>                         |                   |                          |                   |          |
| Northeast                                    | 146               | 148.76                   | 27.39             | 0.0805   |
| Midwest                                      | 189               | 280.76                   | 30.88             |          |
| South                                        | 257               | 282.85                   | 33.77             |          |
| West                                         | 187               | 261.21                   | 55.32             |          |
| <b>Household Construction Year</b>           |                   |                          |                   |          |
| 1978-1998                                    | 201               | 213.87                   | 21.64             | 0.0674   |
| 1960-1977                                    | 253               | 211.40                   | 23.63             |          |
| 1946-1959                                    | 134               | 274.74                   | 51.02             |          |
| 1940-1945                                    | 43                | 372.71                   | 100.41            |          |
| 1939 or earlier                              | 148               | 300.26                   | 50.95             |          |
| <b>How many stories, including basement?</b> |                   |                          |                   |          |
| 1 story                                      | 307               | 280.14                   | 37.76             | 0.2757   |
| 2-3 stories                                  | 409               | 227.39                   | 22.47             |          |
| 4 or more stories                            | 60                | 205.85                   | 45.65             |          |

|                                                  |                     |     |        |       |        |
|--------------------------------------------------|---------------------|-----|--------|-------|--------|
| <b>Main heating source in home?</b>              |                     |     |        |       |        |
|                                                  | Electric            | 217 | 254.71 | 28.68 | 0.7426 |
|                                                  | Gas                 | 405 | 242.37 | 29.28 |        |
|                                                  | Other/none          | 154 | 234.10 | 37.84 |        |
| <b>Does home have air conditioning?</b>          |                     |     |        |       |        |
|                                                  | Air conditioning    | 614 | 229.86 | 18.21 | 0.0260 |
|                                                  | No air conditioning | 164 | 317.27 | 50.31 |        |
| <b>Any pets currently in house?</b>              |                     |     |        |       |        |
|                                                  | Yes                 | 371 | 289.21 | 30.71 | 0.0091 |
|                                                  | No                  | 400 | 214.42 | 18.33 |        |
| <b>Air filtration device in home?</b>            |                     |     |        |       |        |
|                                                  | Yes                 | 97  | 173.43 | 29.41 | 0.0958 |
|                                                  | No                  | 664 | 254.29 | 19.97 |        |
| <b>Dehumidifiers used in home?</b>               |                     |     |        |       |        |
|                                                  | Yes                 | 123 | 175.32 | 23.15 | 0.0439 |
|                                                  | No                  | 643 | 262.54 | 21.67 |        |
| <b>How many people live in house?</b>            |                     |     |        |       |        |
|                                                  | 1 person            | 119 | 262.00 | 42.88 | 0.7018 |
|                                                  | 2 people            | 239 | 242.47 | 21.70 |        |
|                                                  | 3 people            | 158 | 216.48 | 24.87 |        |
|                                                  | 4 people            | 156 | 258.63 | 36.53 |        |
|                                                  | > 4 people          | 107 | 252.71 | 54.65 |        |
| <b>Does anyone in the home smoke cigarettes?</b> |                     |     |        |       |        |
|                                                  | Yes                 | 311 | 323.03 | 33.40 | 0.0073 |
|                                                  | No                  | 464 | 205.55 | 17.07 |        |
| <b>Household Race</b>                            |                     |     |        |       |        |
|                                                  | White               | 584 | 232.86 | 20.59 | 0.1142 |
|                                                  | Black               | 110 | 387.17 | 65.75 |        |
|                                                  | Other               | 70  | 201.87 | 55.44 |        |
| <b>Household Ethnicity</b>                       |                     |     |        |       |        |
|                                                  | Hispanic            | 78  | 248.94 | 66.16 | 0.7029 |
|                                                  | Non-hispanic        | 693 | 241.06 | 17.20 |        |

|                                                   |                          |     |        |        |        |
|---------------------------------------------------|--------------------------|-----|--------|--------|--------|
| <b>Education</b>                                  |                          |     |        |        |        |
|                                                   | Less Than High School    | 511 | 209.80 | 15.14  | 0.0240 |
|                                                   | High School              | 167 | 320.90 | 44.71  |        |
|                                                   | College                  | 64  | 335.17 | 97.77  |        |
| <b>Urbanization</b>                               |                          |     |        |        |        |
|                                                   | MSA >= 1 million         | 259 | 215.29 | 22.15  | 0.1388 |
|                                                   | MSA < 1 million          | 389 | 229.19 | 21.71  |        |
|                                                   | Non-MSA PSU              | 131 | 320.76 | 67.29  |        |
| <b>Household has children under age 18?</b>       |                          |     |        |        |        |
|                                                   | Yes child < 18           | 367 | 248.92 | 30.12  | 0.7678 |
|                                                   | No child <18             | 409 | 243.54 | 16.06  |        |
| <b>Living Room Floor</b>                          |                          |     |        |        |        |
|                                                   | Carpeted                 | 572 | 284.9  | 21.86  | 0.0018 |
|                                                   | Smooth and Cleanable     | 176 | 139.39 | 20.86  |        |
|                                                   | Not Smooth and Cleanable | 5   | 167.44 | 121.58 |        |
| <b>Living Room Mat</b>                            |                          |     |        |        |        |
|                                                   | No                       | 756 | 238.77 | 18.73  | 0.0015 |
|                                                   | Yes                      | 19  | 506.46 | 113.99 |        |
| <b>Living Room Area Rug</b>                       |                          |     |        |        |        |
|                                                   | No                       | 642 | 239.24 | 21.1   | 0.3287 |
|                                                   | Yes                      | 133 | 264.55 | 41.27  |        |
| <b>Living Room Wall-to-Wall Carpet</b>            |                          |     |        |        |        |
|                                                   | No                       | 197 | 157.06 | 23.69  | 0.0029 |
|                                                   | Yes                      | 578 | 283.07 | 23.25  |        |
| <b>No Carpet in Living Room</b>                   |                          |     |        |        |        |
|                                                   | No                       | 681 | 271.86 | 19.47  | 0.0002 |
|                                                   | Yes                      | 94  | 104.46 | 24.48  |        |
| <b>Last time Living Room floor/carpet cleaned</b> |                          |     |        |        |        |
|                                                   | < One Week               | 463 | 213.82 | 18.39  | 0.0120 |
|                                                   | One week or >            | 299 | 281.46 | 27.64  |        |

|                                                 |                   |     |        |        |        |
|-------------------------------------------------|-------------------|-----|--------|--------|--------|
| <b>Last time Living Room Upholstery Cleaned</b> |                   |     |        |        |        |
|                                                 | 1-4 Weeks         | 18  | 205.82 | 72.92  | 0.1685 |
|                                                 | One Month or More | 175 | 294.41 | 37.42  |        |
|                                                 | Never             | 486 | 226.12 | 21.36  |        |
| <b>Temperature in Living Room (F)</b>           |                   |     |        |        |        |
|                                                 | < 65              | 46  | 295.64 | 73.33  | 0.6006 |
|                                                 | 65 - 74           | 312 | 239.5  | 28.41  |        |
|                                                 | 75 - 84           | 354 | 239.15 | 23.55  |        |
|                                                 | > = 84            | 59  | 270.45 | 67.74  |        |
| <b>Humidity in Living Room (%)</b>              |                   |     |        |        |        |
|                                                 | < 40              | 164 | 294.49 | 69.8   | 0.6466 |
|                                                 | 40 - 49           | 232 | 241.42 | 29.93  |        |
|                                                 | 50 - 59           | 194 | 254.05 | 23.66  |        |
|                                                 | 60 - 69           | 119 | 197.05 | 20.81  |        |
|                                                 | > = 70            | 66  | 191.69 | 39.72  |        |
| <b>Observed Moisture in the Living Room</b>     |                   |     |        |        |        |
|                                                 | Yes               | 48  | 553.28 | 177.99 | 0.0061 |
|                                                 | No                | 721 | 232.5  | 17.51  |        |
| <b>Carpet In the Living Room</b>                |                   |     |        |        |        |
|                                                 | Yes               | 681 | 272.51 | 19.54  | 0.0001 |
|                                                 | No                | 94  | 103.05 | 24.03  |        |

\*\* Actual sample size of available dust weight at each location may be less.

## Living Room Upholstery Dust Weight (mg) Summarized by Levels of Factors

| <b>Factor</b>                                |                   | <b>Total</b>      | <b>Living Room Upholstery</b> |                   |          |
|----------------------------------------------|-------------------|-------------------|-------------------------------|-------------------|----------|
|                                              |                   | Sample Size<br>** | Geometric Mean                | Geometric mean SE | p-values |
| <b>Household Income by 20K</b>               |                   |                   |                               |                   |          |
|                                              | \$0-19,999        | 168               | 300.44                        | 46.48             | <0.0001  |
|                                              | \$20,000-39,999   | 212               | 292.62                        | 34.34             |          |
|                                              | \$40,000-59,999   | 142               | 247.20                        | 28.17             |          |
|                                              | \$60,000+         | 182               | 140.42                        | 16.72             |          |
| <b>Season</b>                                |                   |                   |                               |                   |          |
|                                              | Winter            | 173               | 258.97                        | 43.94             | 0.5301   |
|                                              | Summer            | 273               | 222.74                        | 34.28             |          |
|                                              | Fall              | 312               | 261.76                        | 34.30             |          |
| <b>Census Region</b>                         |                   |                   |                               |                   |          |
|                                              | Northeast         | 144               | 183.59                        | 24.58             | 0.0269   |
|                                              | Midwest           | 182               | 326.08                        | 57.96             |          |
|                                              | South             | 252               | 228.85                        | 32.79             |          |
|                                              | West              | 180               | 267.62                        | 40.70             |          |
| <b>Household Construction Year</b>           |                   |                   |                               |                   |          |
|                                              | 1978-1998         | 201               | 198.67                        | 24.12             | 0.0211   |
|                                              | 1960-1977         | 241               | 214.43                        | 23.56             |          |
|                                              | 1946-1959         | 134               | 309.51                        | 41.48             |          |
|                                              | 1940-1945         | 42                | 348.48                        | 99.31             |          |
|                                              | 1939 or earlier   | 140               | 314.56                        | 50.15             |          |
| <b>How many stories, including basement?</b> |                   |                   |                               |                   |          |
|                                              | 1 story           | 302               | 257.21                        | 32.28             | 0.6141   |
|                                              | 2-3 stories       | 394               | 238.54                        | 23.76             |          |
|                                              | 4 or more stories | 60                | 233.38                        | 49.59             |          |

|                                                  |                       |     |        |       |        |
|--------------------------------------------------|-----------------------|-----|--------|-------|--------|
| <b>Main heating source in home?</b>              |                       |     |        |       |        |
|                                                  | Electric              | 213 | 222.25 | 31.21 | 0.5626 |
|                                                  | Gas                   | 391 | 255.13 | 28.91 |        |
|                                                  | Other/none            | 151 | 256.49 | 34.46 |        |
| <b>Does home have air conditioning?</b>          |                       |     |        |       |        |
|                                                  | Air conditioning      | 598 | 238.58 | 21.03 | 0.5660 |
|                                                  | No air conditioning   | 159 | 275.52 | 39.48 |        |
| <b>Any pets currently in house?</b>              |                       |     |        |       |        |
|                                                  | Yes                   | 363 | 266.58 | 27.17 | 0.1646 |
|                                                  | No                    | 387 | 228.81 | 20.65 |        |
| <b>Air filtration device in home?</b>            |                       |     |        |       |        |
|                                                  | Yes                   | 92  | 222.96 | 34.45 | 0.5993 |
|                                                  | No                    | 648 | 246.37 | 20.49 |        |
| <b>Dehumidifiers used in home?</b>               |                       |     |        |       |        |
|                                                  | Yes                   | 121 | 310.83 | 62.52 | 0.0943 |
|                                                  | No                    | 624 | 234.58 | 17.53 |        |
| <b>How many people live in house?</b>            |                       |     |        |       |        |
|                                                  | 1 person              | 112 | 284.28 | 38.76 | 0.1641 |
|                                                  | 2 people              | 231 | 246.25 | 33.00 |        |
|                                                  | 3 people              | 158 | 187.48 | 17.12 |        |
|                                                  | 4 people              | 158 | 275.43 | 34.25 |        |
|                                                  | > 4 people            | 105 | 259.93 | 51.73 |        |
| <b>Does anyone in the home smoke cigarettes?</b> |                       |     |        |       |        |
|                                                  | Yes                   | 305 | 280.35 | 32.72 | 0.0505 |
|                                                  | No                    | 449 | 228.88 | 16.83 |        |
| <b>Household Race</b>                            |                       |     |        |       |        |
|                                                  | White                 | 574 | 261.31 | 23.92 | 0.0066 |
|                                                  | Black                 | 103 | 161.43 | 26.24 |        |
|                                                  | Other                 | 66  | 222.99 | 42.12 |        |
| <b>Household Ethnicity</b>                       |                       |     |        |       |        |
|                                                  | Hispanic              | 72  | 270.78 | 76.18 | 0.6654 |
|                                                  | Non-hispanic          | 678 | 241.46 | 19.24 |        |
| <b>Education</b>                                 |                       |     |        |       |        |
|                                                  | Less Than High School | 61  | 331.08 | 51.65 | 0.0001 |
|                                                  | High School           | 165 | 345.09 | 38.56 |        |
|                                                  | College               | 495 | 209.26 | 19.24 |        |

|                                                        |                          |     |        |       |        |
|--------------------------------------------------------|--------------------------|-----|--------|-------|--------|
| <b>Urbanization</b>                                    |                          |     |        |       |        |
|                                                        | MSA >= 1 million         | 250 | 194.43 | 20.13 | 0.0300 |
|                                                        | MSA < 1 million          | 381 | 237.36 | 26.12 |        |
|                                                        | Non-MSA PSU              | 127 | 341.47 | 68.58 |        |
| <b>Household has children under age 18?</b>            |                          |     |        |       |        |
|                                                        | Yes child < 18           | 361 | 244.58 | 24.23 | 0.5881 |
|                                                        | No child <18             | 394 | 247.43 | 23.88 |        |
| <b>Living Room Floor</b>                               |                          |     |        |       |        |
|                                                        | Carpeted                 | 561 | 250.8  | 22.41 | 0.2230 |
|                                                        | Smooth and Cleanable     | 169 | 239.87 | 39.3  |        |
|                                                        | Not Smooth and Cleanable | 5   | 115.16 | 46.3  |        |
| <b>Living Room Mat</b>                                 |                          |     |        |       |        |
|                                                        | No                       | 735 | 245.1  | 20.22 | 0.8834 |
|                                                        | Yes                      | 19  | 230.59 | 63.12 |        |
| <b>Living Room Area Rug</b>                            |                          |     |        |       |        |
|                                                        | No                       | 622 | 247.74 | 20.71 | 0.6346 |
|                                                        | Yes                      | 132 | 231.19 | 41.49 |        |
| <b>Wall-to-Wall Carpet in Living Room</b>              |                          |     |        |       |        |
|                                                        | No                       | 189 | 235.09 | 42.03 | 0.6857 |
|                                                        | Yes                      | 565 | 247.93 | 18.97 |        |
| <b>No Carpet in Living Room</b>                        |                          |     |        |       |        |
|                                                        | No                       | 667 | 240.88 | 17.82 | 0.8617 |
|                                                        | Yes                      | 87  | 280.28 | 88.41 |        |
| <b>Last time Living Room floor/carpet was cleaned?</b> |                          |     |        |       |        |
|                                                        | < One Week               | 452 | 233.42 | 20.28 | 0.3525 |
|                                                        | One week or >            | 288 | 252.05 | 24.38 |        |
| <b>Last time Living Room Upholstery cleaned?</b>       |                          |     |        |       |        |
|                                                        | 1-4 Weeks                | 18  | 149.93 | 81.42 | 0.0010 |
|                                                        | One Month or More        | 173 | 394.2  | 39.33 |        |
|                                                        | Never                    | 482 | 218.56 | 20.56 |        |
| <b>Temperature in Living Room (F)</b>                  |                          |     |        |       |        |
|                                                        | < 65                     | 44  | 273.05 | 63.86 | 0.0838 |
|                                                        | 65 - 74                  | 297 | 254.23 | 32.45 |        |
|                                                        | 75 - 84                  | 352 | 253.49 | 25.45 |        |
|                                                        | > = 84                   | 58  | 137.06 | 37.78 |        |

| Humidity in Living Room (%)          |         |     |        |       |        |
|--------------------------------------|---------|-----|--------|-------|--------|
|                                      | < 40    | 161 | 294.58 | 60.71 |        |
|                                      | 40 - 49 | 222 | 245.46 | 25.08 |        |
|                                      | 50 - 59 | 190 | 251.85 | 30.69 | 0.1656 |
|                                      | 60 - 69 | 115 | 247.21 | 27.25 |        |
|                                      | > = 70  | 66  | 121.09 | 29.59 |        |
| Observed Moisture in the Living Room |         |     |        |       |        |
|                                      | Yes     | 47  | 244.3  | 53.98 | 0.6801 |
|                                      | No      | 701 | 248.47 | 20.53 |        |
| Carpet In the Living Room            |         |     |        |       |        |
|                                      | Yes     | 667 | 241.39 | 17.88 | 0.8280 |
|                                      | No      | 87  | 275.06 | 86.94 |        |



Table S3. Coefficients from linear regression models.

| SITE/FACTOR                              | Logged<br>Coefficient of<br>Level of Effect | True<br>Coefficient of<br>Level of<br>Effect |
|------------------------------------------|---------------------------------------------|----------------------------------------------|
| <b>Bedroom Bed</b>                       |                                             |                                              |
| Intercept                                | 2.56                                        | <b>363.08</b>                                |
| Household Income by 20k                  |                                             |                                              |
| \$0-19,999                               | 0.29                                        | <b>1.95</b>                                  |
| \$20,000-39999                           | 0.31                                        | <b>2.06</b>                                  |
| \$40,000-59999                           | 0.17                                        | <b>1.47</b>                                  |
| 60,000 +                                 | 0.00                                        | <b>1.00</b>                                  |
| Census Region                            |                                             |                                              |
| Northeast                                | -0.29                                       | <b>0.52</b>                                  |
| Midwest                                  | -0.26                                       | <b>0.56</b>                                  |
| South                                    | -0.10                                       | <b>0.80</b>                                  |
| West                                     | 0.00                                        | <b>1.00</b>                                  |
| HU Construction Year                     |                                             |                                              |
| 1978-1998                                | -0.21                                       | <b>0.61</b>                                  |
| 1960-1977                                | -0.21                                       | <b>0.61</b>                                  |
| 1946-1959                                | -0.05                                       | <b>0.89</b>                                  |
| 1940-1945                                | 0.05                                        | <b>1.11</b>                                  |
| 1939 or earlier                          | 0.00                                        | <b>1.00</b>                                  |
| How many stories,<br>including basement? |                                             |                                              |
| 1 story                                  | -0.34                                       | <b>0.46</b>                                  |
| 2 to 3 stories                           | -0.11                                       | <b>0.78</b>                                  |
| 4 or more stories                        | 0.00                                        | <b>1.00</b>                                  |
| Observed Protective Mattress Covers?     |                                             |                                              |
| No                                       | -0.43                                       | <b>0.37</b>                                  |
| Yes                                      | 0.00                                        | <b>1.00</b>                                  |
| Observed Moisture in the Bedroom?        |                                             |                                              |
| No                                       | 0.28                                        | <b>1.92</b>                                  |
| Yes                                      | 0.00                                        | <b>1.00</b>                                  |
| Stuffed Animals On Bed?                  |                                             |                                              |
| No                                       | -0.16                                       | <b>0.70</b>                                  |
| Yes                                      | 0.00                                        | <b>1.00</b>                                  |
| <b>Bedroom Floor</b>                     |                                             |                                              |
| Intercept                                | 2.24                                        | <b>172.19</b>                                |
| Household Income by 20k                  |                                             |                                              |
| \$0-19,999                               | 0.39                                        | <b>2.43</b>                                  |

|                                     |                     |       |               |
|-------------------------------------|---------------------|-------|---------------|
|                                     | \$20,000-39999      | 0.32  | <b>2.07</b>   |
|                                     | \$40,000-59999      | 0.16  | <b>1.46</b>   |
|                                     | 60,000 +            | 0.00  | <b>1.00</b>   |
| Census Region                       |                     |       |               |
|                                     | Northeast           | -0.16 | <b>0.70</b>   |
|                                     | Midwest             | -0.10 | <b>0.80</b>   |
|                                     | South               | 0.07  | <b>1.19</b>   |
|                                     | West                | 0.00  | <b>1.00</b>   |
| HU Construction Year                |                     |       |               |
|                                     | 1978-1998           | -0.29 | <b>0.51</b>   |
|                                     | 1960-1977           | -0.31 | <b>0.49</b>   |
|                                     | 1946-1959           | -0.20 | <b>0.63</b>   |
|                                     | 1940-1945           | 0.07  | <b>1.17</b>   |
|                                     | 1939 or earlier     | 0.00  | <b>1.00</b>   |
| Does home have air conditioning     |                     |       |               |
|                                     | Air conditioning    | -0.19 | <b>0.65</b>   |
|                                     | No air conditioning | 0.00  | <b>1.00</b>   |
| Household: Any pets?                |                     |       |               |
|                                     | Pet(s)              | 0.10  | <b>1.26</b>   |
|                                     | No Pet(s)           | 0.00  | <b>1.00</b>   |
| Race                                |                     |       |               |
|                                     | White               | -0.20 | <b>0.63</b>   |
|                                     | Black               | 0.09  | <b>1.22</b>   |
|                                     | Other               | 0.00  | <b>1.00</b>   |
| Last time bedroom floor was cleaned |                     |       |               |
|                                     | 1                   | -0.13 | <b>0.75</b>   |
|                                     | 2                   | 0.00  | <b>1.00</b>   |
| Humidity level in the bedroom       |                     |       |               |
|                                     | 1                   | 0.24  | <b>1.74</b>   |
|                                     | 2                   | 0.11  | <b>1.29</b>   |
|                                     | 3                   | 0.03  | <b>1.06</b>   |
|                                     | 4                   | -0.04 | <b>0.91</b>   |
|                                     | 5                   | 0.00  | <b>1.00</b>   |
| OBMOISTB                            |                     |       |               |
|                                     | 1                   | 0.21  | <b>1.61</b>   |
|                                     | 2                   | 0.00  | <b>1.00</b>   |
| DICARPET                            |                     |       |               |
|                                     | 1                   | 0.54  | <b>3.44</b>   |
|                                     | 2                   | 0.00  | <b>1.00</b>   |
| <b>Kitchen Floor</b>                |                     |       |               |
| Intercept                           |                     | 2.18  | <b>149.62</b> |
| HU Construction Year                |                     |       |               |
|                                     | 1978-1998           | -0.25 | <b>0.57</b>   |
|                                     | 1960-1977           | -0.27 | <b>0.54</b>   |

|                                   |                  |       |              |
|-----------------------------------|------------------|-------|--------------|
|                                   | 1946-1959        | -0.12 | <b>0.76</b>  |
|                                   | 1940-1945        | 0.10  | <b>1.25</b>  |
|                                   | 1939 or earlier  | 0.00  | <b>1.00</b>  |
| Household: Any pets?              |                  |       |              |
|                                   | Pet(s)           | 0.15  | <b>1.40</b>  |
|                                   | No Pet(s)        | 0.00  | <b>1.00</b>  |
| Race                              |                  |       |              |
|                                   | White            | -0.01 | <b>0.98</b>  |
|                                   | Black            | 0.16  | <b>1.46</b>  |
|                                   | Other            | 0.00  | <b>1.00</b>  |
| Urbanization                      |                  |       |              |
|                                   | MSA >= 1 million | -0.35 | <b>0.45</b>  |
|                                   | MSA < 1 million  | -0.17 | <b>0.67</b>  |
|                                   | Non-MSA PSU      | 0.00  | <b>1.00</b>  |
| Humidity Level in the Kitchen     |                  |       |              |
|                                   | 1                | 0.13  | <b>1.34</b>  |
|                                   | 2                | -0.02 | <b>0.95</b>  |
|                                   | 3                | -0.06 | <b>0.86</b>  |
|                                   | 4                | -0.17 | <b>0.67</b>  |
|                                   | 5                | 0.00  | <b>1.00</b>  |
| Observed Moisture in the Kitchen? |                  |       |              |
|                                   | Yes              | 0.28  | <b>1.88</b>  |
|                                   | No               | 0.00  | <b>1.00</b>  |
| Any carpet present?               |                  |       |              |
|                                   | Yes              | 0.32  | <b>2.08</b>  |
|                                   | No               | 0.00  | <b>1.00</b>  |
| <b>Living Room Floor</b>          |                  |       |              |
| Intercept                         |                  | 1.80  | <b>63.68</b> |
| Household Income by 20k           |                  |       |              |
|                                   | \$0-19,999       | 0.53  | <b>3.40</b>  |
|                                   | \$20,000-39999   | 0.42  | <b>2.61</b>  |
|                                   | \$40,000-59999   | 0.21  | <b>1.61</b>  |
|                                   | 60,000 +         | 0.00  | <b>1.00</b>  |
| Census Region                     |                  |       |              |
|                                   | Northeast        | -0.25 | <b>0.56</b>  |
|                                   | Midwest          | 0.06  | <b>1.15</b>  |
|                                   | South            | 0.13  | <b>1.35</b>  |
|                                   | West             | 0.00  | <b>1.00</b>  |
| HU Construction Year              |                  |       |              |
|                                   | 1978-1998        | -0.18 | <b>0.66</b>  |
|                                   | 1960-1977        | -0.27 | <b>0.53</b>  |
|                                   | 1946-1959        | -0.11 | <b>0.77</b>  |
|                                   | 1940-1945        | 0.13  | <b>1.35</b>  |
|                                   | 1939 or earlier  | 0.00  | <b>1.00</b>  |

|                                     |                     |       |             |
|-------------------------------------|---------------------|-------|-------------|
| Does home have air conditioning     |                     |       |             |
|                                     | Air conditioning    | -0.24 | <b>0.58</b> |
|                                     | No air conditioning | 0.00  | <b>1.00</b> |
| Household: Any pets?                |                     |       |             |
|                                     | Pet(s)              | 0.29  | <b>1.95</b> |
|                                     | No Pet(s)           | 0.00  | <b>1.00</b> |
| Last Time Living Room Floor Cleaned |                     |       |             |
|                                     | 1                   | -0.17 | <b>0.67</b> |
|                                     | 2                   | 0.00  | <b>1.00</b> |
| Any carpet present?                 |                     |       |             |
|                                     | 1                   | 0.61  | <b>4.07</b> |
|                                     | 2                   | 0.00  | <b>1.00</b> |

## Living Room Upholstery

|                                           |               |       |             |
|-------------------------------------------|---------------|-------|-------------|
| Intercept                                 |               | 0.00  | <b>1.00</b> |
| How many people in the home?              |               |       |             |
|                                           | 1 Person      | -0.18 | <b>0.66</b> |
|                                           | 2 Persons     | -0.25 | <b>0.57</b> |
|                                           | 3 Persons     | -0.11 | <b>0.77</b> |
|                                           | 4 Persons     | 0.05  | <b>1.13</b> |
|                                           | More Than 4   | 0.00  | <b>1.00</b> |
| Race                                      |               |       |             |
|                                           | White         | 0.07  | <b>1.19</b> |
|                                           | Black         | -0.30 | <b>0.50</b> |
|                                           | Other         | 0.00  | <b>1.00</b> |
| Education                                 |               |       |             |
|                                           | College       | 0.04  | <b>1.10</b> |
|                                           | High School   | 0.26  | <b>1.83</b> |
|                                           | < High School | 0.00  | <b>1.00</b> |
| Last Time living room upholstery cleaned? |               |       |             |
|                                           | 1             | -0.18 | <b>0.67</b> |
|                                           | 2             | 0.22  | <b>1.65</b> |
|                                           | 3             | 0.00  | <b>1.00</b> |
| Temperature in the Living Room            |               |       |             |
|                                           | 1             | 0.30  | <b>1.97</b> |
|                                           | 2             | 0.45  | <b>2.81</b> |
|                                           | 3             | 0.41  | <b>2.54</b> |
|                                           | 4             | 0.00  | <b>1.00</b> |

Table S4. Adjusted odds ratios<sup>1</sup> (OR) for current asthma and wheeze, for dust weight (dichotomized at the median value), by house indices, from the National Survey of Lead and Allergens in Housing, 1998-1999. Stratified by allergy status (doctor-diagnosed allergies).

| Locations              | Allergies=No<br>Asthma (n=41)<br>Adjusted OR<br>(95% CI) | Allergies=Yes<br>Asthma (n=130)<br>Adjusted OR<br>(95% CI) | p-<br>value <sup>2</sup> | Allergies=No<br>Wheeze (n=167)<br>Adjusted OR<br>(95% CI) | Allergies=Yes<br>Wheeze (n=176)<br>Adjusted OR<br>(95% CI) | p-<br>value |
|------------------------|----------------------------------------------------------|------------------------------------------------------------|--------------------------|-----------------------------------------------------------|------------------------------------------------------------|-------------|
| Mean Index<br>< Median | Ref                                                      | Ref                                                        |                          | Ref                                                       | Ref                                                        |             |
| > Median               | 2.35 (0.98, 5.64)                                        | 1.20 (0.74, 1.93)                                          | 0.16                     | 1.92 (1.11, 3.31)                                         | 1.46 (0.93, 2.27)                                          | 0.45        |
| Max. Index<br>< Median | Ref                                                      | Ref                                                        |                          | Ref                                                       | Ref                                                        |             |
| > Median               | 1.32 (0.56, 3.10)                                        | 1.25 (0.68, 2.30)                                          | 0.67                     | 1.29 (0.71, 2.35)                                         | 1.80 (0.95, 3.40)                                          | 0.41        |

<sup>1</sup> Adjusted for sex, age (categorized in decades), race, education, and environmental tobacco smoke exposure

<sup>2</sup> p-value for interaction between dust weight and allergy status

Table S5. Adjusted odds ratios<sup>1</sup> (OR) for current asthma and wheeze, for dust weight (dichotomized at the median value), by house indices, from the National Survey of Lead and Allergens in Housing, 1998-1999. Stratified by urban residence status.

| Locations  | Urban=No                                  | Urban=Yes                                | p-value <sup>2</sup> | Urban=No                                  | Urban=Yes                                 | p-value |
|------------|-------------------------------------------|------------------------------------------|----------------------|-------------------------------------------|-------------------------------------------|---------|
|            | Asthma (n=114)<br>Adjusted OR<br>(95% CI) | Asthma (n=60)<br>Adjusted OR<br>(95% CI) |                      | Wheeze (n=250)<br>Adjusted OR<br>(95% CI) | Wheeze (n=103)<br>Adjusted OR<br>(95% CI) |         |
| Mean Index |                                           |                                          |                      |                                           |                                           |         |
| < Median   | Ref                                       | Ref                                      |                      | Ref                                       | Ref                                       |         |
| > Median   | 2.01 (1.20, 3.35)                         | 0.98 (0.51, 1.89)                        | 0.12                 | 1.84 (1.27, 2.68)                         | 1.73 (0.88, 3.39)                         | 0.83    |
| Max. Index |                                           |                                          |                      |                                           |                                           |         |
| < Median   | Ref                                       | Ref                                      | 0.56                 | Ref                                       | Ref                                       | 0.05    |
| > Median   | 1.73 (0.86, 3.48)                         | 1.16 (0.65, 2.07)                        |                      | 1.38 (0.93, 2.06)                         | 2.79 (1.69, 4.61)                         |         |

<sup>1</sup> Adjusted for sex, age (categorized in decades), race, education, and environmental tobacco smoke exposure

<sup>2</sup> p-value for interaction between dust weight and urban residence status

**Table S6. Logistic regression models, with adjustment for allergen and endotoxin concentrations.**

**ASTHMA**

Referent = Quartile 1

|               | Adjusted Model Plus: |                   |                   |                   |                   |                   |                   |                   |
|---------------|----------------------|-------------------|-------------------|-------------------|-------------------|-------------------|-------------------|-------------------|
|               | Adjusted Model       | Alternaria        | Bla G 1           | Can f 1           | Der f + Der p     | Endotoxin         | Fel d 1           | Mus m 1           |
| Bed Q2        | 1.23 (0.63, 2.40)    | 1.30 (0.68, 2.49) | 0.81 (0.36, 1.80) | 1.26 (0.63, 2.51) | 1.28 (0.65, 2.50) | 1.24 (0.63, 2.44) | 1.18 (0.61, 2.30) | 1.07 (0.53, 2.18) |
| Bed Q3        | 1.42 (0.72, 2.78)    | 1.56 (0.79, 3.10) | 1.67 (0.72, 3.86) | 1.46 (0.74, 2.85) | 1.39 (0.71, 2.71) | 1.42 (0.71, 2.81) | 1.37 (0.70, 2.68) | 1.30 (0.66, 2.55) |
| Bed Q4        | 1.89 (1.09, 3.27)    | 2.04 (1.15, 3.59) | 1.98 (1.10, 3.57) | 1.90 (1.09, 3.31) | 1.87 (1.09, 3.22) | 1.97 (1.09, 3.57) | 1.81 (1.06, 3.10) | 1.72 (0.99, 2.97) |
| BR Floor Q2   | 0.83 (0.41, 1.68)    | 0.86 (0.42, 1.73) | 1.44 (0.66, 3.13) | 0.78 (0.37, 1.63) | 0.81 (0.41, 1.63) | 0.73 (0.37, 1.45) | 0.81 (0.40, 1.62) | 1.07 (0.52, 2.22) |
| BR Floor Q3   | 0.88 (0.43, 1.80)    | 0.88 (0.43, 1.81) | 1.23 (0.57, 2.65) | 0.80 (0.39, 1.66) | 0.87 (0.43, 1.76) | 0.82 (0.40, 1.69) | 0.85 (0.41, 1.75) | 1.22 (0.59, 2.51) |
| BR Floor Q4   | 0.92 (0.53, 1.57)    | 0.90 (0.51, 1.56) | 1.55 (0.80, 2.99) | 0.86 (0.49, 1.49) | 0.88 (0.51, 1.52) | 0.85 (0.49, 1.46) | 0.88 (0.51, 1.51) | 1.09 (0.59, 2.00) |
| Kit Floor Q2  | 0.97 (0.49, 1.92)    | 0.97 (0.48, 1.94) | 0.84 (0.43, 1.62) | 0.95 (0.48, 1.90) | 0.95 (0.48, 1.91) | 0.94 (0.47, 1.91) | 0.93 (0.47, 1.87) | 1.03 (0.49, 2.17) |
| Kit Floor Q3  | 1.28 (0.64, 2.54)    | 1.24 (0.62, 2.50) | 1.20 (0.57, 2.52) | 1.23 (0.62, 2.45) | 1.27 (0.63, 2.54) | 1.16 (0.58, 2.33) | 1.24 (0.63, 2.46) | 1.03 (0.48, 2.18) |
| Kit Floor Q4  | 1.92 (1.03, 3.60)    | 1.81 (0.95, 3.44) | 2.00 (1.15, 3.49) | 1.81 (0.95, 3.46) | 1.92 (1.01, 3.64) | 1.75 (0.93, 3.31) | 1.86 (1.00, 3.45) | 1.54 (0.80, 2.94) |
| LR Floor Q2   | 0.65 (0.30, 1.42)    | 0.60 (0.28, 1.31) | 0.64 (0.27, 1.50) | 0.66 (0.30, 1.43) | 0.64 (0.30, 1.39) | 0.56 (0.25, 1.23) | 0.63 (0.29, 1.38) | 0.81 (0.36, 1.81) |
| LR Floor Q3   | 0.83 (0.44, 1.59)    | 0.79 (0.42, 1.51) | 0.69 (0.33, 1.46) | 0.79 (0.41, 1.53) | 0.81 (0.42, 1.56) | 0.74 (0.39, 1.41) | 0.81 (0.42, 1.56) | 1.20 (0.56, 2.60) |
| LR Floor Q4   | 1.52 (1.01, 2.29)    | 1.36 (0.86, 2.14) | 2.31 (1.30, 4.12) | 1.35 (0.88, 2.10) | 1.52 (1.00, 2.30) | 1.32 (0.87, 1.99) | 1.48 (0.98, 2.24) | 1.89 (1.08, 3.32) |
| LR Sofa Q2    | 1.30 (0.69, 2.45)    | 1.23 (0.65, 2.34) | 1.02 (0.49, 2.15) | 1.19 (0.63, 2.26) | 1.30 (0.68, 2.46) | 1.14 (0.60, 2.17) | 1.27 (0.67, 2.40) | 1.24 (0.61, 2.53) |
| LR Sofa Q3    | 0.63 (0.30, 1.33)    | 0.59 (0.28, 1.25) | 0.73 (0.32, 1.64) | 0.58 (0.27, 1.24) | 0.64 (0.31, 1.35) | 0.56 (0.27, 1.18) | 0.61 (0.29, 1.29) | 0.50 (0.25, 1.00) |
| LR Sofa Q4    | 0.98 (0.59, 1.62)    | 0.93 (0.56, 1.53) | 1.38 (0.84, 2.26) | 0.88 (0.52, 1.48) | 1.00 (0.59, 1.69) | 0.88 (0.52, 1.47) | 0.94 (0.57, 1.53) | 1.07 (0.62, 1.84) |
| House Mean Q2 | 1.27 (0.52, 3.15)    | 1.24 (0.51, 3.04) | 2.00 (0.67, 5.96) | 1.23 (0.51, 2.99) | 1.33 (0.55, 3.22) | 1.15 (0.48, 2.77) | 1.23 (0.49, 3.08) | 1.61 (0.60, 4.37) |
| House Mean Q3 | 1.58 (0.77, 3.28)    | 1.63 (0.77, 3.44) | 2.69 (0.99, 7.33) | 1.51 (0.73, 3.12) | 1.54 (0.74, 3.19) | 1.45 (0.69, 3.01) | 1.53 (0.74, 3.17) | 2.67 (1.24, 5.75) |
| House Mean Q4 | 1.79 (0.91, 3.51)    | 1.77 (0.89, 3.54) | 4.22 (1.50, 11.9) | 1.68 (0.84, 3.34) | 1.78 (0.92, 3.47) | 1.68 (0.86, 3.26) | 1.72 (0.87, 3.40) | 2.28 (1.01, 5.18) |
| House Max Q2  | 1.57 (0.81, 3.03)    | 1.60 (0.83, 3.08) | 1.42 (0.61, 3.30) | 1.50 (0.80, 2.84) | 1.53 (0.80, 2.94) | 1.57 (0.82, 3.02) | 1.54 (0.80, 2.99) | 2.46 (1.14, 5.29) |
| House Max Q3  | 1.93 (0.89, 4.18)    | 1.93 (0.88, 4.27) | 2.86 (1.17, 6.98) | 1.84 (0.84, 4.02) | 1.80 (0.82, 3.93) | 1.90 (0.86, 4.19) | 1.90 (0.87, 4.14) | 2.27 (1.05, 4.88) |
| House Max Q4  | 2.21 (1.08, 4.55)    | 2.14 (1.05, 4.38) | 3.21 (1.09, 9.42) | 2.04 (1.00, 4.17) | 2.15 (1.06, 4.36) | 2.18 (1.08, 4.39) | 2.16 (1.06, 4.39) | 2.67 (1.30, 5.50) |

**WHEEZE**

| Comparison | Adjusted Model    | Alternaria        | Bla G 1           | Can f 1           | Der f + Der p     | Endotoxin         | Fel d 1           | Mus m 1           |
|------------|-------------------|-------------------|-------------------|-------------------|-------------------|-------------------|-------------------|-------------------|
| Bed Q2     | 1.42 (0.82, 2.47) | 1.40 (0.82, 2.38) | 0.75 (0.41, 1.38) | 1.41 (0.82, 2.43) | 1.44 (0.83, 2.51) | 1.47 (0.85, 2.54) | 1.37 (0.80, 2.35) | 1.14 (0.71, 1.83) |
| Bed Q3     | 1.29 (0.79, 2.11) | 1.28 (0.78, 2.10) | 0.95 (0.55, 1.65) | 1.26 (0.79, 2.01) | 1.28 (0.79, 2.07) | 1.24 (0.76, 2.03) | 1.25 (0.76, 2.04) | 1.21 (0.71, 2.09) |
| Bed Q4     | 1.99 (1.21, 3.28) | 1.96 (1.17, 3.30) | 1.98 (1.17, 3.36) | 1.91 (1.19, 3.06) | 1.98 (1.22, 3.22) | 1.94 (1.16, 3.25) | 1.92 (1.16, 3.16) | 1.91 (1.07, 3.42) |

|               |                   |                   |                   |                   |                   |                   |                   |                   |
|---------------|-------------------|-------------------|-------------------|-------------------|-------------------|-------------------|-------------------|-------------------|
| BR Floor Q2   | 0.87 (0.40, 1.92) | 0.85 (0.39, 1.83) | 0.89 (0.49, 1.61) | 0.83 (0.38, 1.82) | 0.86 (0.39, 1.88) | 0.76 (0.35, 1.68) | 0.85 (0.39, 1.85) | 0.74 (0.42, 1.28) |
| BR Floor Q3   | 0.79 (0.48, 1.29) | 0.76 (0.46, 1.25) | 1.21 (0.70, 2.07) | 0.74 (0.45, 1.22) | 0.78 (0.47, 1.28) | 0.68 (0.42, 1.13) | 0.76 (0.47, 1.24) | 0.90 (0.56, 1.44) |
| BR Floor Q4   | 1.46 (0.86, 2.48) | 1.40 (0.83, 2.37) | 2.17 (1.28, 3.68) | 1.36 (0.80, 2.33) | 1.43 (0.85, 2.42) | 1.27 (0.75, 2.16) | 1.40 (0.84, 2.35) | 1.59 (0.95, 2.65) |
| Kit Floor Q2  | 1.51 (0.91, 2.49) | 1.44 (0.87, 2.41) | 1.44 (0.72, 2.86) | 1.48 (0.89, 2.46) | 1.48 (0.90, 2.46) | 1.48 (0.87, 2.50) | 1.45 (0.87, 2.40) | 1.21 (0.65, 2.24) |
| Kit Floor Q3  | 1.68 (0.99, 2.86) | 1.61 (0.96, 2.71) | 1.73 (0.95, 3.16) | 1.59 (0.94, 2.71) | 1.67 (0.98, 2.84) | 1.57 (0.90, 2.76) | 1.63 (0.97, 2.76) | 1.42 (0.73, 2.74) |
| Kit Floor Q4  | 1.30 (0.78, 2.18) | 1.23 (0.74, 2.05) | 1.52 (0.94, 2.48) | 1.24 (0.74, 2.10) | 1.29 (0.77, 2.15) | 1.22 (0.72, 2.07) | 1.25 (0.74, 2.09) | 1.20 (0.66, 2.18) |
| LR Floor Q2   | 1.19 (0.75, 1.89) | 1.15 (0.71, 1.84) | 1.24 (0.68, 2.25) | 1.18 (0.73, 1.90) | 1.18 (0.74, 1.87) | 1.06 (0.64, 1.77) | 1.15 (0.72, 1.82) | 1.21 (0.74, 1.96) |
| LR Floor Q3   | 1.55 (1.07, 2.25) | 1.50 (1.01, 2.22) | 1.32 (0.82, 2.12) | 1.51 (1.04, 2.19) | 1.54 (1.06, 2.22) | 1.38 (0.94, 2.03) | 1.51 (1.04, 2.19) | 1.23 (0.81, 1.87) |
| LR Floor Q4   | 1.51 (0.94, 2.44) | 1.44 (0.89, 2.34) | 1.91 (0.99, 3.67) | 1.43 (0.88, 2.34) | 1.50 (0.92, 2.45) | 1.38 (0.83, 2.28) | 1.48 (0.91, 2.40) | 1.56 (0.88, 2.76) |
| LR Sofa Q2    | 1.27 (0.73, 2.19) | 1.24 (0.72, 2.14) | 0.92 (0.48, 1.74) | 1.22 (0.70, 2.11) | 1.27 (0.74, 2.18) | 1.18 (0.69, 2.02) | 1.24 (0.72, 2.12) | 1.04 (0.60, 1.80) |
| LR Sofa Q3    | 1.26 (0.72, 2.21) | 1.22 (0.69, 2.16) | 1.27 (0.68, 2.36) | 1.20 (0.68, 2.11) | 1.27 (0.73, 2.23) | 1.14 (0.65, 2.01) | 1.22 (0.70, 2.12) | 1.09 (0.63, 1.89) |
| LR Sofa Q4    | 2.81 (1.52, 5.21) | 2.73 (1.45, 5.11) | 2.57 (1.38, 4.77) | 2.64 (1.43, 4.88) | 2.87 (1.54, 5.35) | 2.57 (1.39, 4.76) | 2.71 (1.47, 4.97) | 2.39 (1.41, 4.07) |
| House Mean Q2 | 0.99 (0.58, 1.69) | 0.94 (0.55, 1.61) | 0.96 (0.59, 1.56) | 0.96 (0.56, 1.64) | 1.00 (0.59, 1.68) | 0.88 (0.51, 1.53) | 0.95 (0.55, 1.63) | 1.20 (0.66, 2.20) |
| House Mean Q3 | 1.98 (1.12, 3.50) | 1.91 (1.08, 3.37) | 1.62 (0.95, 2.78) | 1.87 (1.06, 3.31) | 1.94 (1.10, 3.42) | 1.76 (0.98, 3.14) | 1.91 (1.08, 3.37) | 2.05 (1.25, 3.38) |
| House Mean Q4 | 1.59 (1.06, 2.38) | 1.52 (1.01, 2.27) | 2.20 (1.41, 3.43) | 1.49 (0.99, 2.24) | 1.57 (1.06, 2.33) | 1.43 (0.94, 2.16) | 1.53 (1.02, 2.30) | 1.96 (1.24, 3.09) |
| House Max Q2  | 1.41 (0.77, 2.60) | 1.38 (0.75, 2.54) | 1.03 (0.61, 1.75) | 1.36 (0.75, 2.48) | 1.40 (0.77, 2.55) | 1.28 (0.69, 2.39) | 1.39 (0.76, 2.55) | 1.40 (0.88, 2.22) |
| House Max Q3  | 1.96 (1.22, 3.17) | 1.90 (1.19, 3.06) | 2.78 (1.72, 4.47) | 1.87 (1.16, 3.01) | 1.91 (1.17, 3.13) | 1.82 (1.12, 2.95) | 1.93 (1.20, 3.13) | 2.21 (1.33, 3.69) |
| House Max Q4  | 1.81 (1.18, 2.75) | 1.74 (1.13, 2.68) | 2.43 (1.41, 4.18) | 1.69 (1.11, 2.56) | 1.77 (1.16, 2.70) | 1.67 (1.09, 2.55) | 1.76 (1.16, 2.66) | 2.09 (1.32, 3.31) |
